# Supplementary material for: Mechanochemical synthesis of amorphous and crystalline Na2P2S6 – elucidation of local structural changes by X-ray total scattering and NMR
Source: Royal Society of Chemistry journal article supplement (doi:10.1039/c9dt04777h), 2020-01-01
Supplement: c9dt04777h1.pdf [file c9dt04777h1.pdf]

## Electronic Supplementary Information

### Synthesis of crystalline Na<sub>2</sub>P<sub>2</sub>S<sub>6</sub> via a ball milling route and comparison of its local structure to the amorphous phase

Charlotte Fritsch, Anna-Lena Hansen\*, Sylvio Indris, Michael Knapp and Helmut Ehrenberg

Institute for Applied Materials – Energy Storage Systems (IAM-ESS), Karlsruhe Institute of Technology, Hermann-von Helmholtz-Platz 1, 76344 Eggenstein-Leopoldshafen, Germany

Table S1: Refined structural parameters obtained from powder diffraction of crystalline Na<sub>2</sub>P<sub>2</sub>S<sub>6</sub> at room temperature compared to those of a single crystal measurement from Ref. <sup>13</sup>.

|                                  | Na <sub>2</sub> P <sub>2</sub> S <sub>6</sub> synthesized by ballmilling and subsequent thermal annealing | Na <sub>2</sub> P <sub>2</sub> S <sub>6</sub> synthesized by solid state reaction by Lotsch et al. <sup>[9]</sup> |
|----------------------------------|-----------------------------------------------------------------------------------------------------------|-------------------------------------------------------------------------------------------------------------------|
| Space group                      | P2 <sub>1</sub> /m (11)                                                                                   | P2 <sub>1</sub> /m (11)                                                                                           |
| Lattice parameters               |                                                                                                           |                                                                                                                   |
| a / Å                            | 6.6861(3)                                                                                                 | 6.6752(3)                                                                                                         |
| b / Å                            | 7.8314 (4)                                                                                                | 7.7968(4)                                                                                                         |
| c / Å                            | 9.0418 (4)                                                                                                | 9.0379(4)                                                                                                         |
| β / °                            | 90.223 (4)                                                                                                | 90.151(1)                                                                                                         |
| Cell volume                      | 473.44 (4)                                                                                                | 470.38(4)                                                                                                         |
| Atomic coordinates Na            |                                                                                                           |                                                                                                                   |
| x                                | 0.2829 (0.0028)                                                                                           | 0.2863(2)                                                                                                         |
| y                                | 0.0136 (0.0017)                                                                                           | 0.01241(9)                                                                                                        |
| z                                | 0.7130 (0.0016)                                                                                           | 0.71003(7)                                                                                                        |
| Structural strain<br>dD/D *10E-4 | 34.34 (0.12)                                                                                              | -                                                                                                                 |
| GOF                              | 2.458                                                                                                     | 1.090                                                                                                             |

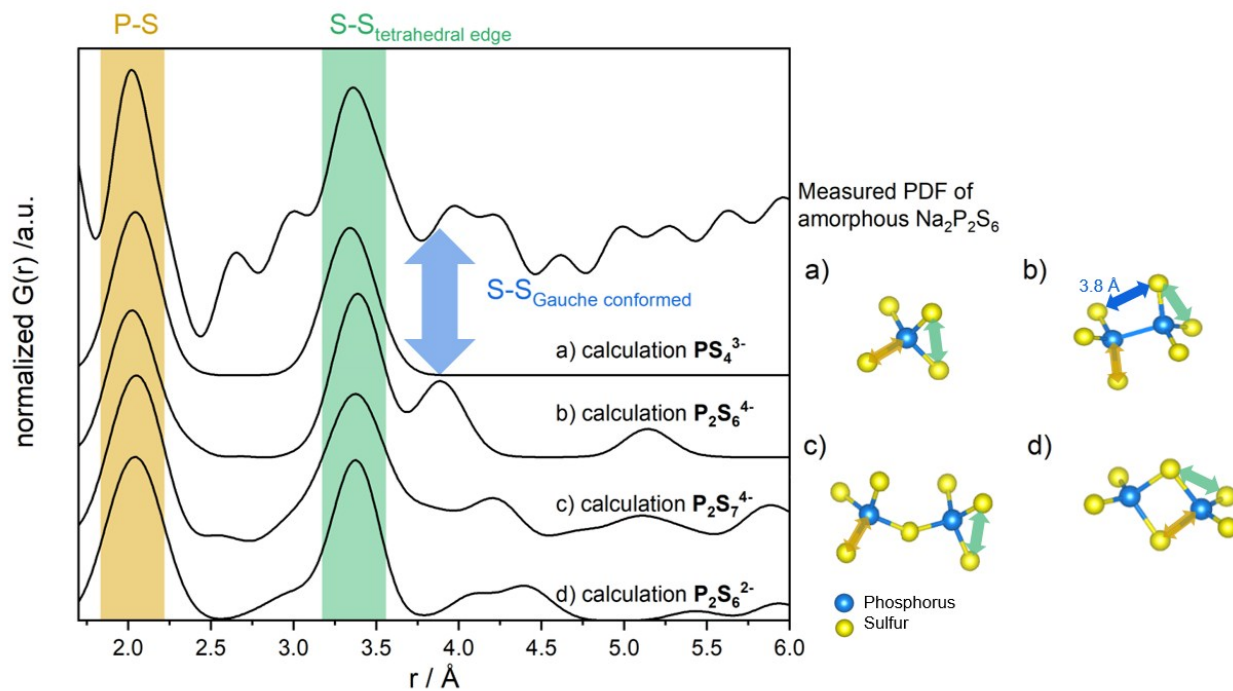

Figure S1: Zoom into the short range region of the pair distribution functions of amorphous  $\text{Na}_2\text{P}_2\text{S}_6$  compared with modeled PDFs of single  $[\text{PS}_4]^{3-}$ ,  $[\text{P}_2\text{S}_6]^{4-}$ ,  $[\text{P}_2\text{S}_7]^{4-}$  and  $[\text{P}_2\text{S}_6]^{2-}$  structural building blocks. Atomic distances are marked with yellow, green and blue arrows.

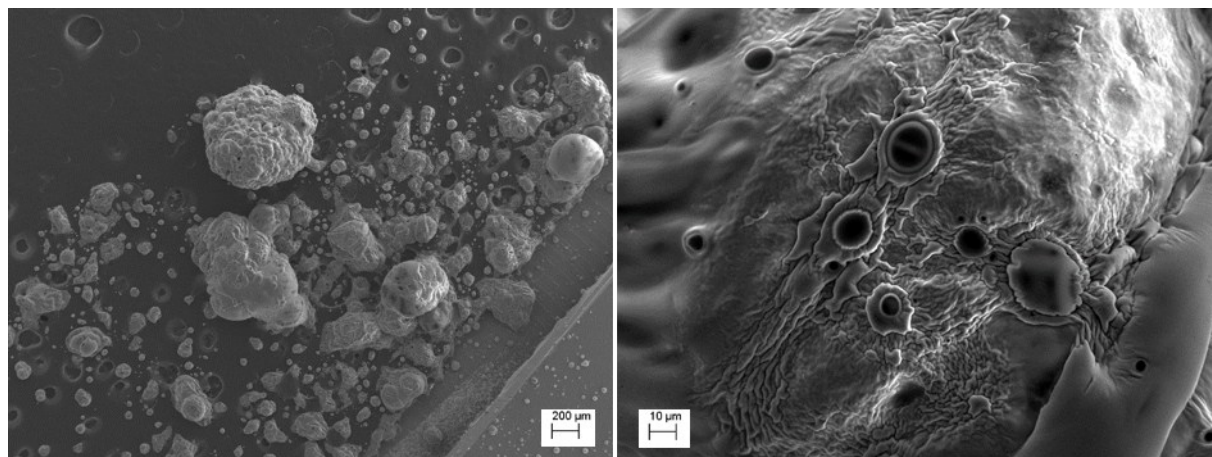

Figure S2: Figure S1-SEM image of amorphous  $\text{Na}_2\text{P}_2\text{S}_6$ .

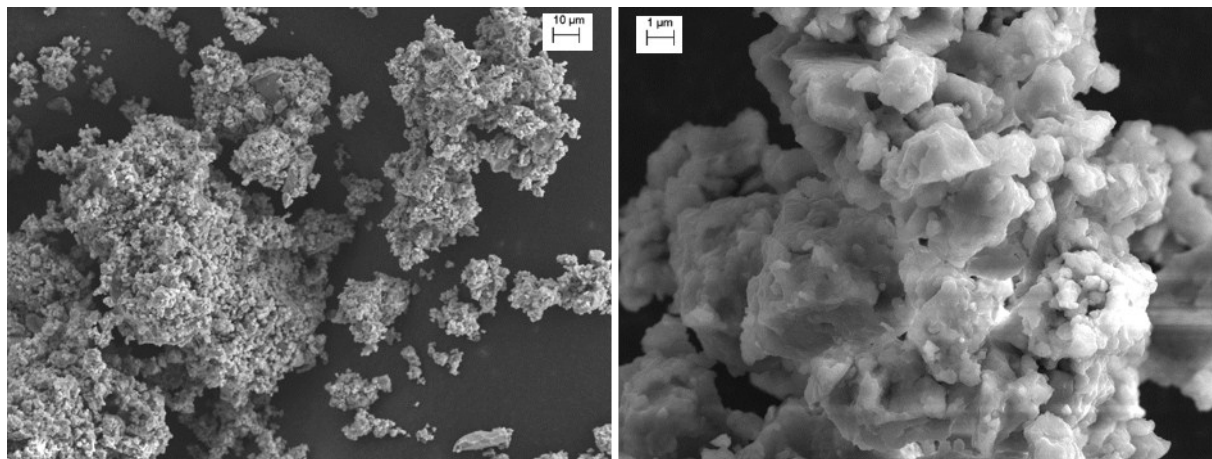

Figure 10: Figure S2-SEM image of crystalline  $\text{Na}_2\text{P}_2\text{S}_6$ .

## Comparison of crystal structures of the same symmetry $P2_1/m$ ( No. 11 ) [ unique axis b ]

### Structure #1

|                                                    |    |    |          |          |          |  |
|----------------------------------------------------|----|----|----------|----------|----------|--|
| 11                                                 |    |    |          |          |          |  |
| 6.67893 7.81782 9.05651 90.00000 90.35290 90.00000 |    |    |          |          |          |  |
| 8                                                  |    |    |          |          |          |  |
| P                                                  | 1  | 2e | 0.210080 | 0.250000 | 0.390070 |  |
| P                                                  | 3  | 2e | 0.322040 | 0.250000 | 0.082430 |  |
| S                                                  | 1  | 4f | 0.228740 | 0.448750 | 0.226260 |  |
| S                                                  | 5  | 2e | 0.618980 | 0.250000 | 0.043230 |  |
| S                                                  | 7  | 2e | 0.447430 | 0.250000 | 0.519680 |  |
| S                                                  | 9  | 2e | 0.147200 | 0.250000 | 0.899310 |  |
| S                                                  | 11 | 2e | 0.944070 | 0.250000 | 0.486700 |  |
| Na                                                 | 1  | 4f | 0.287390 | 0.990860 | 0.700950 |  |

### Structure #2

|                                                 |   |    |          |          |          |  |
|-------------------------------------------------|---|----|----------|----------|----------|--|
| 11                                              |   |    |          |          |          |  |
| 6.68609 7.83137 9.04181 90.0000 90.2232 90.0000 |   |    |          |          |          |  |
| 8                                               |   |    |          |          |          |  |
| P                                               | 1 | 2e | 0.786600 | 0.250000 | 0.613400 |  |

|    |   |    |          |          |          |
|----|---|----|----------|----------|----------|
| P  | 2 | 2e | 0.684100 | 0.250000 | 0.925800 |
| S  | 1 | 4f | 0.237800 | 0.549100 | 0.225300 |
| S  | 2 | 2e | 0.385500 | 0.250000 | 0.949900 |
| S  | 3 | 2e | 0.545700 | 0.250000 | 0.483800 |
| S  | 4 | 2e | 0.854600 | 0.250000 | 0.089600 |
| S  | 5 | 2e | 0.046000 | 0.250000 | 0.515000 |
| Na | 1 | 4f | 0.282900 | 0.013600 | 0.713000 |

## Description of Structure #2 in the most similar configuration to Structure #1

```

011
6.686090 7.831370 9.041810 90.000000 90.223198 90.000000
8
P      1      2e      0.213400 0.250000 0.386600
P      2      2e      0.315900 0.250000 0.074200
S      1      4f      0.237800 0.450900 0.225300
S      2      2e      0.614500 0.250000 0.050100
S      3      2e      0.454300 0.250000 0.516200
S      4      2e      0.145400 0.250000 0.910400
S      5      2e      0.954000 0.250000 0.485000
Na     1      4f      0.282900 0.986400 0.713000

```

Transformation matrix (P, p): **a,b,c** ; 0,1/2,0

Matrix form:

$$(P, p) = \begin{pmatrix} 1 & 0 & 0 & 0 \\ 0 & 1 & 0 & 1/2 \\ 0 & 0 & 1 & 0 \end{pmatrix}$$

## Atom pairings and distances

| Atom Mappings |           |                               |                              |                               |                              |
|---------------|-----------|-------------------------------|------------------------------|-------------------------------|------------------------------|
| WP            | Atom      | Coordinates in S <sub>1</sub> | Atom                         | Coordinates in S <sub>2</sub> |                              |
| 2e            | (x,1/4,z) | P1                            | (0.210080,0.250000,0.390070) | P1                            | (0.213400,0.250000,0.386600) |
| 2e            | (x,1/4,z) | P3                            | (0.322040,0.250000,0.082430) | P2                            | (0.315900,0.250000,0.074200) |
| 4f            | (x,y,z)   | S1                            | (0.228740,0.448750,0.226260) | S1                            | (0.237800,0.450900,0.225300) |

|    |           |     |                              |     |                              |
|----|-----------|-----|------------------------------|-----|------------------------------|
| 2e | (x,1/4,z) | S5  | (0.618980,0.250000,0.043230) | S2  | (0.614500,0.250000,0.050100) |
| 2e | (x,1/4,z) | S7  | (0.447430,0.250000,0.519680) | S3  | (0.454300,0.250000,0.516200) |
| 2e | (x,1/4,z) | S9  | (0.147200,0.250000,0.899310) | S4  | (0.145400,0.250000,0.910400) |
| 2e | (x,1/4,z) | S11 | (0.944070,0.250000,0.486700) | S5  | (0.954000,0.250000,0.485000) |
| 4f | (x,y,z)   | Na1 | (0.287390,0.990860,0.700950) | Na1 | (0.282900,0.986400,0.713000) |

| WP | Atom      | Atomic Displacements |         |         |         |        |
|----|-----------|----------------------|---------|---------|---------|--------|
|    |           | $u_x$                | $u_y$   | $u_z$   | $ u $   |        |
| 2e | (x,1/4,z) | P1                   | 0.0033  | 0.0000  | -0.0035 | 0.0386 |
| 2e | (x,1/4,z) | P3                   | -0.0061 | 0.0000  | -0.0082 | 0.0849 |
| 4f | (x,y,z)   | S1                   | 0.0091  | 0.0022  | -0.0010 | 0.0635 |
| 2e | (x,1/4,z) | S5                   | -0.0045 | 0.0000  | 0.0069  | 0.0692 |
| 2e | (x,1/4,z) | S7                   | 0.0069  | 0.0000  | -0.0035 | 0.0558 |
| 2e | (x,1/4,z) | S9                   | -0.0018 | 0.0000  | 0.0111  | 0.1012 |
| 2e | (x,1/4,z) | S11                  | 0.0099  | 0.0000  | -0.0017 | 0.0682 |
| 4f | (x,y,z)   | Na1                  | -0.0045 | -0.0045 | 0.0120  | 0.1186 |

NOTE:  $u_x$ ,  $u_y$  and  $u_z$  are given in relative units.  $|u|$  is the absolute distance given in Å

### Evaluation of the structure similarity

| S      | $d_{max.}$ (Å) | $d_{av.}$ (Å) | $\Delta$ |
|--------|----------------|---------------|----------|
| 0.0010 | 0.1186         | 0.0782        | 0.016    |

- Lattice and atomic position criteria:
  - The [degree of lattice distortion \(S\)](#) is the spontaneous strain (sum of the squared eigenvalues of the strain tensor divided by 3). For the given two structures, the **degree of lattice distortion (S)** is **0.0010**.
  - The maximum distance ( $d_{max.}$ ) shows the maximal displacement between the atomic positions of the paired atoms. The **maximum distance ( $d_{max.}$ )** in this case is: **0.1186 Å**
- The [arithmetic mean \( \$d\_{av.}\$ \)](#) of the distance. In this case, the **arithmetic mean ( $d_{av.}$ )** is **0.0782 Å**
- The [measure of similarity \( \$\Delta\$ \)](#) (Bergerhoff *et al.*, 1998) is a function of the differences in atomic positions (weighted by the multiplicities of the sites) and the ratios of the

corresponding lattice parameters of the structures. The **measure of similarity ( $\Delta$ )** calculated for this case is **0.016**.
